# Supplementary material for: Dynamic development of the protein corona on silica nanoparticles: composition and role in toxicity
Source: Royal Society of Chemistry journal article supplement (doi:10.1039/c3nr33280b), 2013-01-01
Supplement: c3nr33280b_2.pdf [file c3nr33280b_2.pdf]

| Protein name                | Biological Function                                                                                                                        | p-value  | Benjamini<br>-<br>Hochberg<br>correction | Difference<br>between<br>NP | Comments                            | Difference<br>between<br>individual NP                                                      | prevalence<br>value |
|-----------------------------|--------------------------------------------------------------------------------------------------------------------------------------------|----------|------------------------------------------|-----------------------------|-------------------------------------|---------------------------------------------------------------------------------------------|---------------------|
| <b>Acute phase</b>          |                                                                                                                                            |          |                                          |                             |                                     |                                                                                             |                     |
| α-2-HS-glycoprotein         | acute-phase response; negative regulation of bone mineralization; positive regulation of phagocytosis; regulation of inflammatory response | 1.73E-57 | 3.33E-05                                 | yes                         | ↓SiO <sub>2</sub> -COO <sup>-</sup> | SiO <sub>2</sub><br>SiO <sub>2</sub> -NH <sub>2</sub><br>SiO <sub>2</sub> -COO <sup>-</sup> | 104.15              |
| Fibronectin                 | Acute phase; angiogenesis; cell adhesion, cell shape                                                                                       | 1.09E-85 | 1.67E-05                                 | yes                         | ↑SiO <sub>2</sub> -COO <sup>-</sup> | SiO <sub>2</sub> -COO <sup>-</sup>                                                          | 29.20               |
| Prothrombin                 | Acute phase, blood coagulation                                                                                                             | 1.45E-15 | 1.25E-04                                 | yes                         | ↑SiO <sub>2</sub> -NH <sub>2</sub>  | -                                                                                           | 18.19               |
| <b>Complement Pathway</b>   |                                                                                                                                            |          |                                          |                             |                                     |                                                                                             |                     |
| C3                          | Complement alternate pathway; complement pathway; immunity; inflammatory response; innate immunity                                         | 9.44E-14 | 1.50E-04                                 | yes                         | all diff?                           | SiO <sub>2</sub><br>SiO <sub>2</sub> -NH <sub>2</sub>                                       | 88.41               |
| Factor B                    | Complement alternate pathway; immunity; innate immunity                                                                                    | 2.93E-01 | 9.17E-04                                 | no                          |                                     | -                                                                                           | 31.29               |
| C4                          | Complement alternate pathway; complement pathway; immunity; inflammatory response; innate immunity                                         | 7.81E-17 | 1.17E-04                                 | yes                         | ↑SiO <sub>2</sub> -COO <sup>-</sup> | -                                                                                           | 16.38               |
| C4b-binding protein α-chain | Complement pathway; immunity; innate immunity                                                                                              | 1.94E-19 | 9.17E-05                                 | yes                         | ↑SiO <sub>2</sub> -COO <sup>-</sup> | -                                                                                           | 7.03                |
| C7                          | Complement alternate pathway; complement pathway; Cytolysis; immunity; innate immunity                                                     | 1.92E-01 | 8.75E-04                                 | no                          |                                     | -                                                                                           | 6.78                |
| Factor H                    | Complement alternate pathway; immunity; innate immunity                                                                                    | 1.56E-58 | 2.50E-05                                 | yes                         | ↑SiO <sub>2</sub> -COO <sup>-</sup> | SiO <sub>2</sub> -NH <sub>2</sub><br>SiO <sub>2</sub> -COO <sup>-</sup>                     | 31.78               |
| <b>Coagulation Factors</b>  |                                                                                                                                            |          |                                          |                             |                                     |                                                                                             |                     |
| Factor XIIIa inhibitor      | Blood coagulation; Regulation of proteolysis                                                                                               | 1.41E-03 | 5.25E-04                                 | no                          |                                     | -                                                                                           | 12.01               |
| Plasminogen                 | Blood coagulation; fibrinolysis; tissue remodeling                                                                                         | 1.70E-46 | 5.00E-05                                 | yes                         | ↓SiO <sub>2</sub> -NH <sub>2</sub>  | -                                                                                           | 34.59               |
