# Supplementary material for: Dynamic development of the protein corona on silica nanoparticles: composition and role in toxicity
Source: Royal Society of Chemistry journal article supplement (doi:10.1039/c3nr33280b), 2013-01-01
Supplement: c3nr33280b_3.pdf [file c3nr33280b_3.pdf]

| Protein name               | Biological Function                                                                                                                                                                                                                                                                                                              | p-value  | Benjamini-Hochberg correction | Difference between NP | Comments                            | Difference between individual NP                                                            | prevalence value |
|----------------------------|----------------------------------------------------------------------------------------------------------------------------------------------------------------------------------------------------------------------------------------------------------------------------------------------------------------------------------|----------|-------------------------------|-----------------------|-------------------------------------|---------------------------------------------------------------------------------------------|------------------|
| <b>Transport</b>           |                                                                                                                                                                                                                                                                                                                                  |          |                               |                       |                                     |                                                                                             |                  |
| Serum Albumin              | Cellular response to starvation; hemolysis by symbiont of host erythrocytes; maintenance of mitochondrion location; negative regulation of apoptosis; transport                                                                                                                                                                  | 4.9E-159 | 8.33E-06                      | yes                   | ↓SiO <sub>2</sub> -COO <sup>-</sup> | SiO <sub>2</sub><br>SiO <sub>2</sub> -NH <sub>2</sub><br>SiO <sub>2</sub> -COO <sup>-</sup> | 234.18           |
| Apolipoprotein A-I         | Cholesterol metabolism; lipid metabolism; lipid transport; steroid metabolism; transport                                                                                                                                                                                                                                         | 4.03E-32 | 7.50E-05                      | yes                   | ↓SiO <sub>2</sub> -NH <sub>2</sub>  | SiO <sub>2</sub>                                                                            | 99.12            |
| α-fetoprotein              | Transport                                                                                                                                                                                                                                                                                                                        | 1.81E-04 | 4.50E-04                      | yes                   | all diff?                           | -                                                                                           | 33.65            |
| Apolipoprotein A-II        | Lipid transport; transport                                                                                                                                                                                                                                                                                                       | 7.62E-07 | 3.25E-04                      | yes                   | all diff?                           | SiO <sub>2</sub> -NH <sub>2</sub><br>SiO <sub>2</sub> -COO <sup>-</sup>                     | 18.76            |
| Apolipoprotein E           | Lipid transport; transport                                                                                                                                                                                                                                                                                                       | 7.56E-03 | 6.25E-04                      | no                    |                                     | -                                                                                           | 7.14             |
| β-2-glycoprotein 1         | ref: Lundqvist et al 2007                                                                                                                                                                                                                                                                                                        | 3.13E-55 | 4.17E-05                      | yes                   | all diff?                           | -                                                                                           | 21.92            |
| Clusterin                  | Cell death; chaperone-mediated protein folding; positive regulation of NF-kappaB transcription factor activity; positive regulation of proteasomal ubiquitin-dependent protein catabolic process; positive regulation of protein ubiquitination involved in ubiquitin-dependent protein catabolic process; protein stabilization | 5.79E-01 | 9.83E-04                      | no                    |                                     | -                                                                                           | 8.44             |
| Hemoglobin fetal sub. β    | Oxygen transport; transport                                                                                                                                                                                                                                                                                                      | 5.62E-07 | 3.17E-04                      | yes                   | all diff?                           | -                                                                                           | 55.92            |
| Hemoglobin subunit α       | Oxygen transport; transport                                                                                                                                                                                                                                                                                                      | 1.32E-03 | 5.17E-04                      | no                    |                                     | -                                                                                           | 22.78            |
| Hemoglobin subunit β       | Oxygen transport; transport                                                                                                                                                                                                                                                                                                      | 1.54E-02 | 6.42E-04                      | no                    |                                     | -                                                                                           | 19.94            |
| Serotransferrin            | Ion transport; iron transport; transport                                                                                                                                                                                                                                                                                         | 1.67E-15 | 1.33E-04                      | yes                   | ↓SiO <sub>2</sub> -NH <sub>2</sub>  | SiO <sub>2</sub><br>SiO <sub>2</sub> -COO <sup>-</sup>                                      | 18.58            |
| Thyroxine-binding globulin | Major thyroid hormone transport protein in serum                                                                                                                                                                                                                                                                                 | 4.09E-11 | 1.83E-04                      | yes                   | ↑SiO <sub>2</sub> -NH <sub>2</sub>  | SiO <sub>2</sub>                                                                            | 6.59             |
| Transthyretin              | Transport                                                                                                                                                                                                                                                                                                                        | 4.67E-08 | 2.58E-04                      | yes                   | all diff?                           | SiO <sub>2</sub> -NH <sub>2</sub>                                                           | 6.71             |
| Vitamin D-binding protein  | Transport                                                                                                                                                                                                                                                                                                                        | 3.42E-21 | 8.33E-05                      | yes                   | ↑SiO <sub>2</sub> -NH <sub>2</sub>  | -                                                                                           | 9.31             |
