# Supplementary material for: Dynamic development of the protein corona on silica nanoparticles: composition and role in toxicity
Source: Royal Society of Chemistry journal article supplement (doi:10.1039/c3nr33280b), 2013-01-01
Supplement: c3nr33280b_4.pdf [file c3nr33280b_4.pdf]

| Protein name                        | Biological Function                                                                                                                                                                                                                                                                                                    | p-value  | Benjamini-Hochberg correction | Difference between NP | Comments                            | Difference between individual NP   | prevalence value |
|-------------------------------------|------------------------------------------------------------------------------------------------------------------------------------------------------------------------------------------------------------------------------------------------------------------------------------------------------------------------|----------|-------------------------------|-----------------------|-------------------------------------|------------------------------------|------------------|
| <b>Regulation of proteolysis</b>    |                                                                                                                                                                                                                                                                                                                        |          |                               |                       |                                     |                                    |                  |
| α-1-antiproteinase                  | Regulation of proteolysis                                                                                                                                                                                                                                                                                              | 7.41E-15 | 1.42E-04                      | yes                   | all diff?                           | -                                  | 44.45            |
| Pigment epithelium-derived factor   | Positive regulation of neurogenesis; Regulation of proteolysis                                                                                                                                                                                                                                                         | 1.28E-03 | 5.08E-04                      | no                    |                                     | -                                  | 21.76            |
| Plasma serine protease inhibitor    | Regulation of proteolysis                                                                                                                                                                                                                                                                                              | 1.88E-33 | 6.67E-05                      | yes                   | ↑SiO <sub>2</sub> -COO <sup>-</sup> | SiO <sub>2</sub>                   | 10.66            |
| <b>Hyaluronan metabolic process</b> |                                                                                                                                                                                                                                                                                                                        |          |                               |                       |                                     |                                    |                  |
| ITIH H1                             | Hyaluronan metabolic process                                                                                                                                                                                                                                                                                           | 4.72E-07 | 3.08E-04                      | yes                   | all diff?                           | -                                  | 13.14            |
| ITIH H3                             | Hyaluronan metabolic process                                                                                                                                                                                                                                                                                           | 4.75E-02 | 7.17E-04                      | no                    |                                     | SiO <sub>2</sub>                   | 15.59            |
| ITIH H4                             | Hyaluronan metabolic process; acute phase response                                                                                                                                                                                                                                                                     | 1.28E-05 | 3.83E-04                      | yes                   | ↓SiO <sub>2</sub> -COO <sup>-</sup> | SiO <sub>2</sub>                   | 39.22            |
| <b>Inhibitors</b>                   |                                                                                                                                                                                                                                                                                                                        |          |                               |                       |                                     |                                    |                  |
| α-2-macroglobulin                   | Protease inhibitor; Serine protease inhibitor                                                                                                                                                                                                                                                                          | 7.05E-04 | 5.00E-04                      | no                    |                                     | -                                  | 42.35            |
| Protein AMBP                        | Inter-alpha-trypsin inhibitor inhibits trypsin, plasmin, and lysosomal granulocytic elastase. Inhibits calcium oxalate crystallization                                                                                                                                                                                 | 2.06E-12 | 1.75E-4                       | yes                   | ↑SiO <sub>2</sub> -NH <sub>2</sub>  | -                                  | 18.45            |
| <b>Other</b>                        |                                                                                                                                                                                                                                                                                                                        |          |                               |                       |                                     |                                    |                  |
| Thrombospondin-1                    | Cell adhesion                                                                                                                                                                                                                                                                                                          | 5.57E-05 | 4.17E-04                      | yes                   | ↑SiO <sub>2</sub> -COO <sup>-</sup> | -                                  | 9.04             |
| Gelsolin                            | Calcium-regulated, actin-modulating protein that binds to the plus (or barbed) ends of actin monomers or filaments, preventing monomer exchange (end-blocking or capping). It can promote the assembly of monomers into filaments (nucleation) as well as sever filaments already formed. Plays a role in ciliogenesis | 1.60E-2  | 6.50E-4                       | no                    |                                     | -                                  | 17.51            |
| Tetranectin                         | Tetranectin binds to plasminogen and to isolated kringle 4. May be involved in the packaging of molecules destined for exocytosis                                                                                                                                                                                      | 6.99E-43 | 5.83E-05                      | yes                   | ↑SiO <sub>2</sub> -COO <sup>-</sup> | SiO <sub>2</sub> -COO <sup>-</sup> | 13.84            |

|                           |          |          |     |           |   |       |
|---------------------------|----------|----------|-----|-----------|---|-------|
| $\alpha$ -1B-glycoprotein | 1.19E-01 | 8.00E-04 | no  |           | - | 14.17 |
| Fetuin-B                  | 1.17E-08 | 2.50E-04 | yes | all diff? | - | 15.51 |
