# Supplementary figures and images for: Dynamic development of the protein corona on silica nanoparticles: composition and role in toxicity
Source: Royal Society of Chemistry journal article supplement (doi:10.1039/c3nr33280b), 2013-01-01

**Figure SD1**

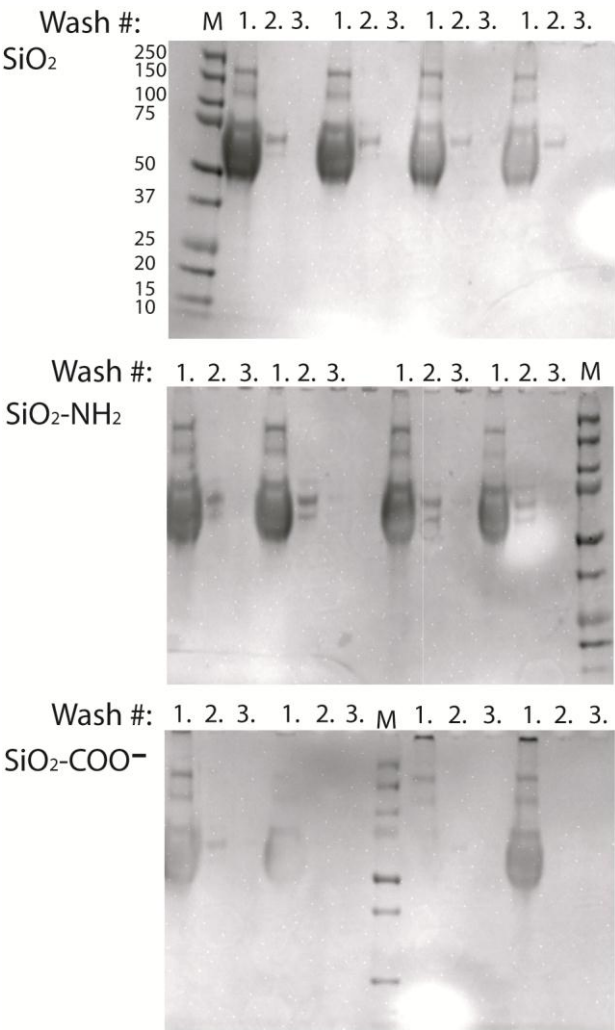

SDS PAGE analysis of supernatant following 1, 2, and 3 washing steps of NP.

Supplement: c3nr33280b.pdf [file c3nr33280b.pdf]
